# Supplementary material for: High-throughput screen reveals sRNAs regulating crRNA biogenesis by targeting CRISPR leader to repress Rho termination
Source: PubMed Central journal article supplement (PMC6700203; doi:10.1038/s41467-019-11695-8), 2019-08-19
Supplement: 41467_2019_11695_MOESM3_ESM.pdf [file 41467_2019_11695_MOESM3_ESM.pdf]

## Description of Additional Supplementary Files

**File name: Supplementary Data 1.**

**Description:** Intergenic sRNA candidates and annotated sRNA in *Pseudomonas aeruginosa* binding to CRISPR loci by T4 RNA Ligase in vivo. "1" represents sRNA-containing chimaeras; "0" represents no sRNA chimaeras.

**File name: Supplementary Data 2.**

**Description:** Bacterial strains, phage and plasmid used in this study.

**File name: Supplementary Data 3.**

**Description:** Primer Sequences for library screening.
